# Supplementary material for: Designed synthesis of a “One for Two” hydrophilic magnetic amino-functionalized metal-organic framework for highly efficient enrichment of glycopeptides and phosphopeptides
Source: PubMed Central journal article supplement (PMC5430903; doi:10.1038/s41598-017-01341-y), 2017-04-25
Supplement: 41598_2017_1341_MOESM1_ESM.pdf [file 41598_2017_1341_MOESM1_ESM.pdf]

1 **Designed synthesis of a “One for Two”**  
2 **hydrophilic magnetic amino-functionalized**  
3 **metal-organic framework for highly efficient**  
4 **enrichment of glycopeptides and**  
5 **phosphopeptides**

6 **Supporting Information**

7 Yiqin Xie<sup>1</sup>, Chunhui Deng<sup>1,\*</sup>

8 <sup>1</sup>Department of Chemistry and Institutes of Biomedical Sciences, Collaborative Innovation  
9 Center of Genetics and Development, Fudan University, Shanghai 200433, China

10 \*Correspondence to [chdeng@fudan.edu.cn](mailto:chdeng@fudan.edu.cn)

11  
12 **Experimental Section**

13 **1. Materials and reagents**

14 Zirconium tetrachloride (ZrCl<sub>4</sub>), 2-aminoterephthalic acid (H<sub>2</sub>BDC-NH<sub>2</sub>), Phosphoric acid  
15 (H<sub>3</sub>PO<sub>4</sub>), N,N'-Dimethylformamide (DMF), Horseradish peroxidase (HRP), Immunoglobulin G  
16 (IgG), β-casein from bovine milk, Albumin from bovine serum (BSA), Trypsin from bovine  
17 pancreas, Formic Acid (FA) and Trifluoroacetic acid (TFA) were purchased from  
18 Sigma-Aldrich. Iron (III) chloride hexahydrate (FeCl<sub>3</sub>•6H<sub>2</sub>O), Sodium acetate (CH<sub>3</sub>COONa),  
19 Ethanol, Ethylene glycol, Ammonium hydroxide (NH<sub>3</sub>•H<sub>2</sub>O) and Ammonium bicarbonate  
20 (NH<sub>4</sub>HCO<sub>3</sub>) were purchased from Sinopharm Chemical Reagent Co., Ltd. Acetonitrile (ACN)  
21 was purchased from Merck. Tris(hydroxymethyl) aminomethane (Tris), and  
22 2,5-dihydroxybenzoic acid (DHB) were purchased from J&K Scientific. Human serum was  
23 supplied by Zhongshan Hospital. All other chemicals are of the top grade commercially  
24 available. Distilled water was purified using Milli-Q system (Millipore, Bedford, MA).

25 **2. Synthesis of Fe<sub>3</sub>O<sub>4</sub>@PDA@UiO-66-NH<sub>2</sub>**

26 Fe<sub>3</sub>O<sub>4</sub> nanoparticles were prepared via a well-known solvo-thermal reaction.<sup>1</sup> In detail,  
27 1.35 g FeCl<sub>3</sub>•6H<sub>2</sub>O was dispersed in 75 mL ethylene glycol under stirring until completely  
28 dissolved. Then, 3.60 g smashed CH<sub>3</sub>COONa was added into the above solution and under  
29 stirring for 30 min until a homogeneous solution was obtained. After that, the solution was  
30 transferred into a Teflon-lined stainless-steel autoclave and kept at 200°C for 16h. The  
31 obtained Fe<sub>3</sub>O<sub>4</sub> was collected by magnetic separation, washed with deionized water and  
32 ethanol for several times and finally kept in vacuum oven at 50°C.

33 Fe<sub>3</sub>O<sub>4</sub>@PDA was prepared via the polymerization of dopamine in basic solution. In detail,  
34 0.12 g Fe<sub>3</sub>O<sub>4</sub> was added into 80 mL Tris buffer, which contained 0.05 g Tris and 0.32 g  
35 dopamine hydrochloride. The solution was kept vigorously stirring for 16 h at room  
36 temperature. The obtained Fe<sub>3</sub>O<sub>4</sub>@PDA was collected by magnetic separation, washed with  
37 deionized water and ethanol for several times and kept in vacuum oven at 50°C.

1  $\text{Fe}_3\text{O}_4@\text{PDA}@ \text{UiO}-66\text{-NH}_2$  was prepared by a simple one-pot reaction. 0.10 g  
2  $\text{Fe}_3\text{O}_4@\text{PDA}$  was dispersed in 75 mL DMF of MOFs precursors, containing 0.16 g  $\text{ZrCl}_4$  (9mM)  
3 and 0.12 g (9mM) 2-aminoterephthalic acid ( $\text{H}_2\text{BDC-NH}_2$ ) under  $120\text{C}^\circ$  for 45 min. The  
4 obtained  $\text{Fe}_3\text{O}_4@\text{PDA}@ \text{UiO}-66\text{-NH}_2$  was collected by magnetic separation, washed with  
5 DMF and ethanol for several times and kept in vacuum oven at  $50\text{C}^\circ$ .

### 6 **3. Characterization and measurements**

7 Scanning electron microscopy (SEM) images and Energy dispersive X-ray (EDX) were  
8 operated on a Philips XL30 electron microscope (Netherlands) at 20 kV. Transmission  
9 electron microscopy (TEM) images were operated on a JEOL 2011 microscope (Japan) at 200  
10 kV. Fourier transform infrared spectra (FT-IR) was operated on a Nicolet Fourier  
11 spectrophotometer (U.S.A.). Raman spectra (Raman) was operated on a LabRam-1B Raman  
12 spectrometer. Magnetization measurement was operated on a MPMS (SQUID) VSM (U.S.A.).  
13 Powder X-ray diffraction patterns (XRD) were operated on a Bruker D4 X-ray diffractometer  
14 at 40 kV, 40 mA. Nitrogen sorption isotherms were operated on a Micromeritics Tristar 3000  
15 analyzer (U.S.A.) at 77 K. Zeta potential measurements were operated on a Nano ZS90 zeta  
16 analyzer (Malvern Instruments Ltd.).

### 17 **4. Sample preparation**

18 The as-prepared  $\text{Fe}_3\text{O}_4@\text{PDA}@ \text{UiO}-66\text{-NH}_2$  was suspended in deionized water to make  
19 a dispersion of 10 mg/mL solution for further use.

20 For glycopeptide: 30 mg DHB was added into 1 mL 50%ACN to make a dispersion of 30  
21 mg/mL solution for further use.

22 For phosphopeptide: 20 mg DHB was added into 1 mL 50%ACN (containing 1%  $\text{H}_3\text{PO}_4$ )  
23 to make a dispersion of 20 mg/mL solution for further use.

24 Horseradish peroxidase (HRP), Immunoglobulin G (IgG),  $\beta$ -Casein and Albumin from  
25 bovine serum (BSA) were dissolved in 25 mM  $\text{NH}_4\text{HCO}_3$  buffer (pH=8.3), denatured at  $100\text{C}^\circ$   
26 for 10 min and incubated with trypsin (trypsin: protein is 1:50, w/w) at  $37\text{C}^\circ$  for 16 h. The  
27 final concentration of HRP was 2 mg/mL, IgG was 4 mg/mL,  $\beta$ -Casein was 2.5 mg/mL and  
28 BSA was 5 mg/mL. The obtained tryptic digests were diluted with loading buffer  
29 (90%ACN/1%TFA for glycopeptide and 50%ACN/0.1%TFA for phosphopeptide) for further  
30 enrichment and analysis.

31 For glycopeptide enrichment: Human serum (2  $\mu\text{L}$ ) was diluted in 198  $\mu\text{L}$   $\text{NH}_4\text{HCO}_3$   
32 buffer and denatured for 10 min. The mixture was reduced by 10 mM DTT at  $60\text{C}^\circ$  for 30  
33 min and alkylated by 20 mM IAA at  $37\text{C}^\circ$  for 1 h in the dark. Then the obtained mixture was  
34 incubated with trypsin (trypsin: protein is 1:50, w/w) at  $37\text{C}^\circ$  for 16 h. The obtained tryptic  
35 digests were lyophilized for further enrichment and analysis.

36 For phosphopeptide enrichment: Human serum (2  $\mu\text{L}$ ) was diluted in 50%ACN/0.1%TFA  
37 by 10 fold without additional process.

### 38 **5. Enrichment of glycopeptides or phosphopeptides from standard tryptic digests**

39 The workflow of glycopeptide or phosphopeptide enrichment is illustrated in Scheme  
40 S1.

41 For glycopeptide enrichment: Detailedly, 200  $\mu\text{g}$   $\text{Fe}_3\text{O}_4@\text{PDA}@ \text{UiO}-66\text{-NH}_2$  was added  
42 into 100  $\mu\text{L}$  mixture of peptides (diluted by 90%ACN/1%TFA) and the obtained solution was  
43 vibrated in a vortex at  $37\text{C}^\circ$  for 30 min. After removal of the supernatant under magnetic  
44 separation, the MOFs was rinsed with 90%ACN/1%TFA once and 80%ACN/1% $\text{H}_3\text{PO}_4$  twice to

1 remove non-glycopeptides. After that, 5  $\mu\text{L}$  30%ACN/0.1%FA was added into the MOFs and  
2 vibrated in the same vortex to elute the glycopeptides at 37  $^{\circ}\text{C}$  for 20 min. The elution was  
3 collected under magnetic separation.

4 For phosphopeptide enrichment: Detailedly, 200  $\mu\text{g}$   $\text{Fe}_3\text{O}_4@\text{PDA}@UiO-66-\text{NH}_2$  was  
5 added into 100  $\mu\text{L}$  mixture of peptides (diluted by 50%ACN/0.1%TFA) and the obtained  
6 solution was vibrated in a vortex at 37  $^{\circ}\text{C}$  for 30 min. After removal of the supernatant under  
7 magnetic separation, the MOFs was rinsed with 50%ACN/0.1%TFA three times to remove  
8 non-phosphopeptides. After that, 10  $\mu\text{L}$  0.4 M  $\text{NH}_3\cdot\text{H}_2\text{O}$  was added into the MOFs and  
9 vibrated in the same vortex to elute the phosphopeptides at 37  $^{\circ}\text{C}$  for 20 min. The elution  
10 was collected under magnetic separation.

11 Finally, 1  $\mu\text{L}$  of elution was deposited on a MALDI plate and let dry, followed by 0.5  $\mu\text{L}$   
12 DHB and let dry and analyzed by matrix-assisted laser desorption ionization time-of-flight  
13 mass spectrometry (MALDI-TOF MS).

#### 14 **6. MALDI-TOF MS analysis**

15 MALDI-TOF MS measurements were operated on a 5800 Proteomics Analyzer (Applied  
16 Biosystems, U.S.A.) in positive ion mode at the Nd:YAG laser of 355 nm, the repetition rate of  
17 200 Hz and the acceleration voltage of 20 kV.

#### 18 **7. Enrichment of glycopeptides or phosphopeptides from tryptic digest mixtures of** 19 **HRP/ $\beta$ -Casein and BSA**

20 200  $\mu\text{g}$   $\text{Fe}_3\text{O}_4@\text{PDA}@UiO-66-\text{NH}_2$  was added into 100  $\mu\text{L}$  tryptic digest mixtures of  
21 HRP/ $\beta$ -Casein and BSA at a given mass ratio. The enrichment process was the same as the  
22 section 5. The collected elution was analyzed by MALDI-TOF MS.

#### 23 **8. Enrichment of glycopeptides or phosphopeptides from healthy human serum**

24 For glycopeptide enrichment: The lyophilized tryptic digests of human serum were  
25 redissolved in 100  $\mu\text{L}$  loading buffer and then 400  $\mu\text{g}$   $\text{Fe}_3\text{O}_4@\text{PDA}@UiO-66-\text{NH}_2$  was added  
26 into the above solution. The enrichment process was the same as the section 5. The collected  
27 elution was lyophilized and redissolved in 50  $\mu\text{L}$  25 mM  $\text{NH}_4\text{HCO}_3$  solution, and then 1  $\mu\text{L}$   
28 PNGase F was added at 37 $^{\circ}\text{C}$  for 16 h to remove the glycans. The collected solution was  
29 lyophilized again for further LC-MS/MS analysis.

30 For phosphopeptide enrichment:

31 For human serum without treatment: It was the same as the standard phosphoprotein.  
32 Detailedly, 200  $\mu\text{g}$   $\text{Fe}_3\text{O}_4@\text{PDA}@UiO-66-\text{NH}_2$  was added into 200  $\mu\text{L}$  serum dilution,  
33 containing 10  $\mu\text{L}$  10-fold-diluted human serum and 190  $\mu\text{L}$  loading buffer. After enrichment,  
34 washing and elution, 1  $\mu\text{L}$  of elution was deposited on a MALDI plate and let dry, followed by  
35 0.5  $\mu\text{L}$  DHB and let dry and analyzed by matrix-assisted laser desorption ionization  
36 time-of-flight mass spectrometry (MALDI-TOF MS).

37 For human serum digests: The lyophilized tryptic digests of human serum were  
38 redissolved in 100  $\mu\text{L}$  loading buffer and then 400  $\mu\text{g}$   $\text{Fe}_3\text{O}_4@\text{PDA}@UiO-66-\text{NH}_2$  was added  
39 into the above solution. The enrichment process was the same as the section 5. The collected  
40 elution was lyophilized for further LC-MS/MS analysis.

#### 41 **9. Nano High Performance Liquid Chromatography- Mass Spectrometry (LC-MS/MS)** 42 **analysis of glycopeptides and phosphopeptides**

43 The peptide samples were resuspended with 10  $\mu\text{L}$  solvent A respectively (A: water with  
44 0.1% formic acid; B: ACN with 0.1% formic acid), separated by nanoLC and analyzed by

1 on-line electrospray tandem mass spectrometry. The experiments were performed on an  
2 EASY-nLC 1000 system (Thermo Fisher Scientific, Waltham, MA) connected to an Orbitrap  
3 Fusion mass spectrometer (Thermo Fisher Scientific, San Jose, CA) equipped with an online  
4 nano-electrospray ion source. 4  $\mu$ L peptide sample was loaded onto the analytical column  
5 (Acclaim PepMap C18, 75  $\mu$ m x 50 cm) with a linear gradient, from 2% B to 40% B in 110 min.  
6 The column was re-equilibrated at initial conditions for 10 min. The column flow rate was  
7 maintained at 200nL/min. The electrospray voltage of 2.0 kV versus the inlet of the mass  
8 spectrometer was used.

9 The Orbitrap Fusion mass spectrometer was operated in the data-dependent mode to  
10 switch automatically between MS and MS/MS acquisition. Survey full-scan MS spectra (m/z  
11 350-1500) were acquired in Orbitrap with a mass resolution of 120 000 at m/z 200. The AGC  
12 target was set to 300 000, and the maximum injection time was 50ms. MS/MS acquisition was  
13 performed in Orbitrap with 3 s cycle time, the resolution was 30 000 at m/z 200. The intensity  
14 threshold was 50 000, and the maximum injection time was 150 ms. The AGC target was set  
15 to 200 000, and the isolation window was 2 m/z. Ions with charge states 2+, 3+, and 4+ were  
16 sequentially fragmented by higher energy collisional dissociation (HCD) with a normalized  
17 collision energy (NCE) of 30%, fixed first mass was set at 110. In all cases, one microscan was  
18 recorded using dynamic exclusion of 50 seconds.

## 19 **10. Database Search**

20 For glycopeptide search:

21 Tandem mass spectra were extracted by Proteome Discoverer software (Thermo Fisher  
22 Scientific, version 1.4.0.288). Charge state deconvolution and deisotoping were not  
23 performed. All MS/MS samples were analyzed using Mascot (Matrix Science, London, UK;  
24 version 2.3). Mascot was set up to search the human Uniprot-SwissProt database (release  
25 2015\_03\_11, with 20199 entries) assuming the digestion enzyme trypsin. Mascot was  
26 searched with a fragment ion mass tolerance of 0.050 Da and a parent ion tolerance of 10.0  
27 PPM. Carbamidomethyl of cysteine was specified in Mascot as fixed modifications. Oxidation  
28 of methionine and deamidation of asparagine were specified in Mascot as a variable  
29 modification. Percolator algorithm was used to control peptide level false discovery rates  
30 (FDR) lower than 1%.

31 Only the identified deamination sites which were confirmed to the N-glycosylation  
32 consensus sequence (n-!P-[S/T]) were considered as glycosylation sites.

33 For phosphopeptide search:

34 The raw mass spectrometry data files were extracted using the Proteome Discoverer  
35 software (Thermo Fisher Scientific, version 1.4.0.288), and the MS/MS results were analyzed  
36 using Mascot (Matrix Science, London, UK; version 2.3). The search parameters were as  
37 follows: Database was specified in Mascot as Uniprot-SwissProt (Taxonomy: human, 20199  
38 entries), enzyme was specified as trypsin, a fragment ion mass tolerance was specified as  
39 0.050 Da and a parent ion tolerance was specified as 10.0 PPM. Carbamidomethyl of cysteine  
40 was specified in Mascot as fixed modifications. Variable modifications of +80 Da for Ser, Thr,  
41 and Tyr, and +16 Da for Met. Peptide level false discovery rates (FDR) were controlled lower  
42 than 1% by the percolator algorithm. Using the PhosphoRS 3.0 software to calculate the  
43 probability of phosphorylation site.

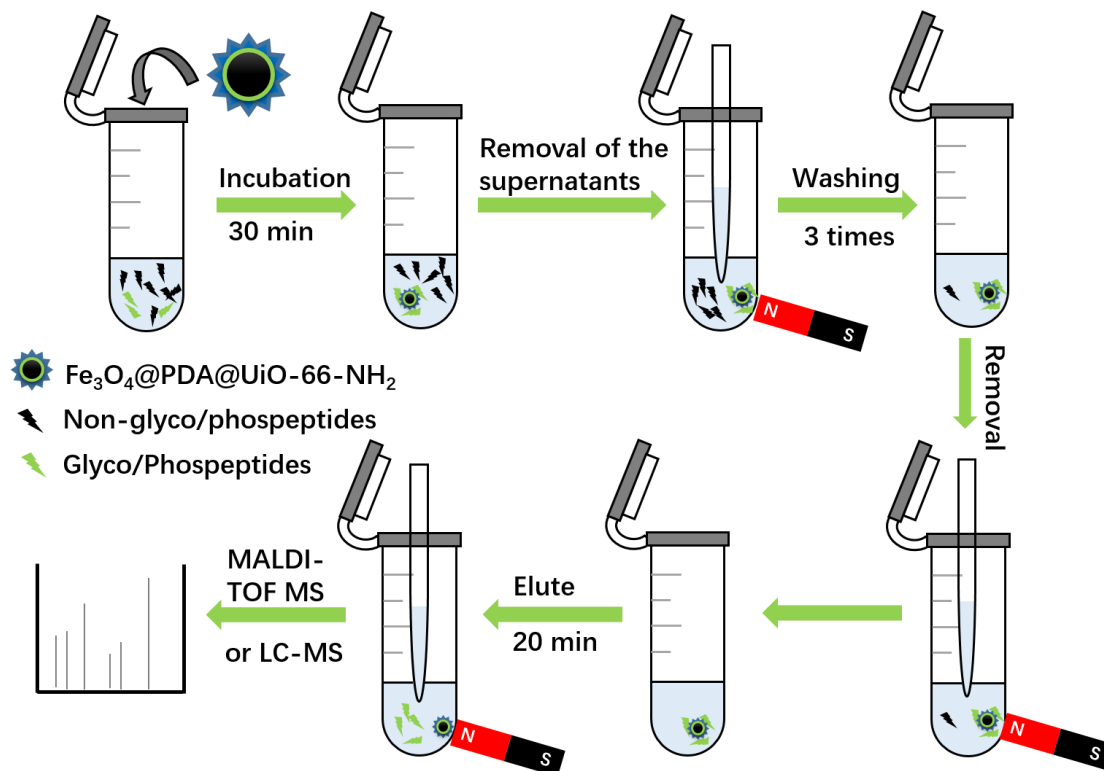

1  
2  
3  
4

**Figure S1.** Workflow of glycopeptide or phosphopeptide enrichment from biological samples using Fe<sub>3</sub>O<sub>4</sub>@PDA@UiO-66-NH<sub>2</sub>.

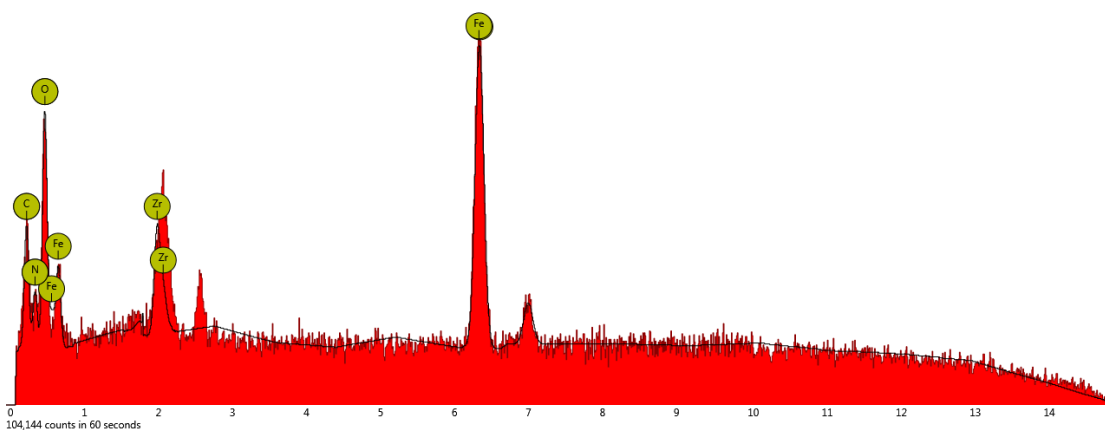

5

| Element Number | Element Symbol | Element Name | Weight Concentration | Error |
|----------------|----------------|--------------|----------------------|-------|
| 26             | Fe             | Iron         | 41.9                 | 0.1   |
| 8              | O              | Oxygen       | 20.0                 | 0.2   |
| 40             | Zr             | Zirconium    | 8.0                  | 1.1   |
| 6              | C              | Carbon       | 18.2                 | 1.0   |
| 7              | N              | Nitrogen     | 11.9                 | 0.8   |

6  
7

**Figure S2.** Energy dispersive X-ray (EDX) spectrum data of Fe<sub>3</sub>O<sub>4</sub>@PDA@UiO-66-NH<sub>2</sub>.

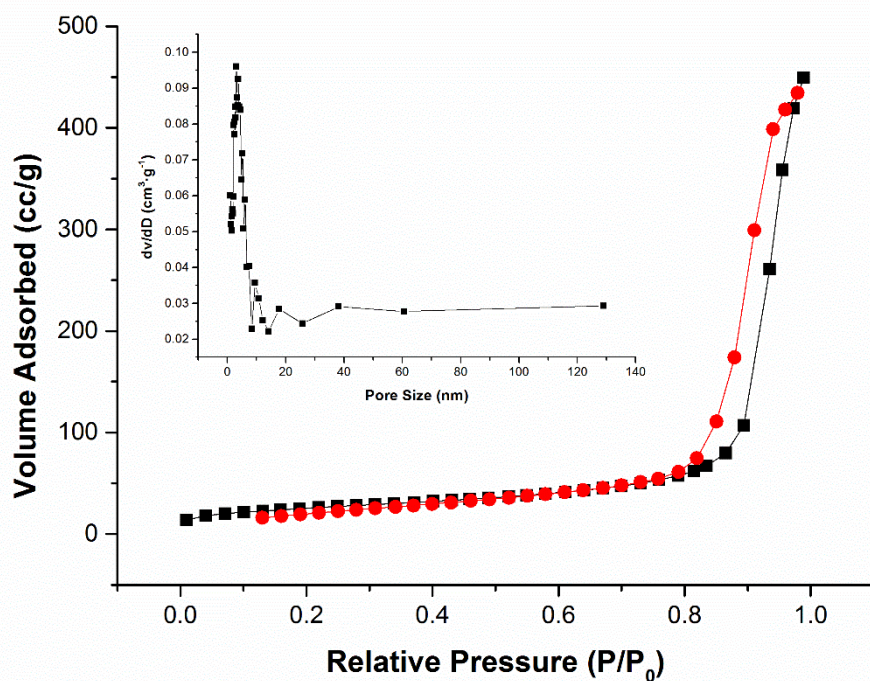

1  
 2 **Figure S3.** Nitrogen sorption isotherms and pore size distribution of  
 3  $\text{Fe}_3\text{O}_4@PDA@UiO-66-NH_2$ .  
 4

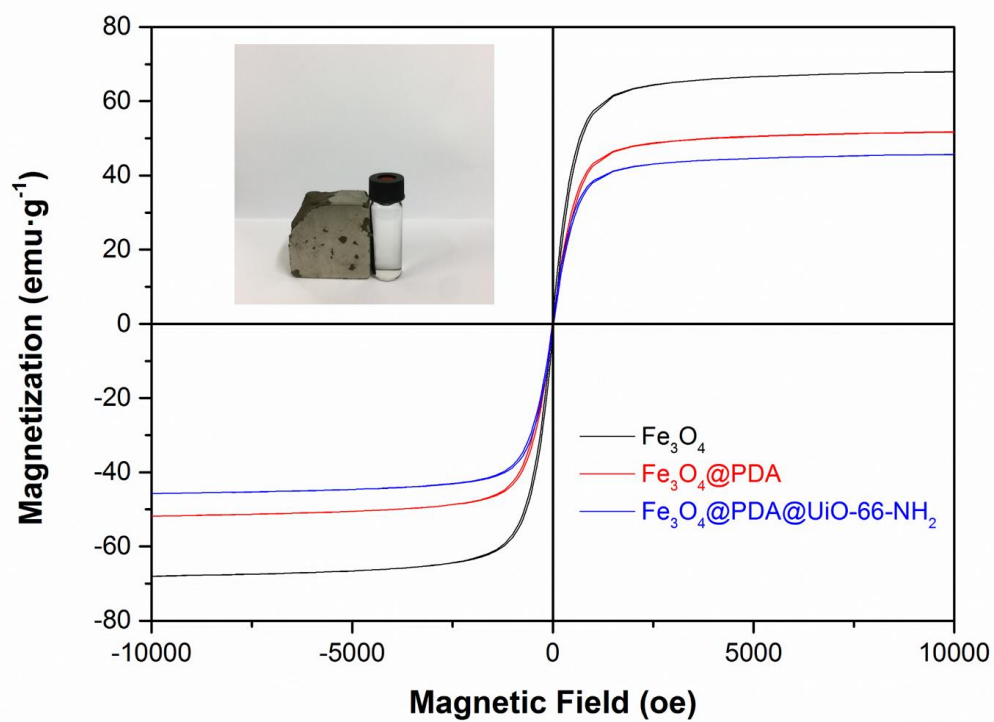

5  
 6 **Figure S4.** Magnetic hysteresis curves of  $\text{Fe}_3\text{O}_4$ ,  $\text{Fe}_3\text{O}_4@PDA$  and  $\text{Fe}_3\text{O}_4@PDA@UiO-66-NH_2$ .  
 7 The saturation magnetization values of  $\text{Fe}_3\text{O}_4$ ,  $\text{Fe}_3\text{O}_4@PDA$  and  $\text{Fe}_3\text{O}_4@PDA@UiO-66-NH_2$

1 were  $67.9 \text{ emu}\cdot\text{g}^{-1}$ ,  $51.6 \text{ emu}\cdot\text{g}^{-1}$  and  $45.6 \text{ emu}\cdot\text{g}^{-1}$  respectively.

2

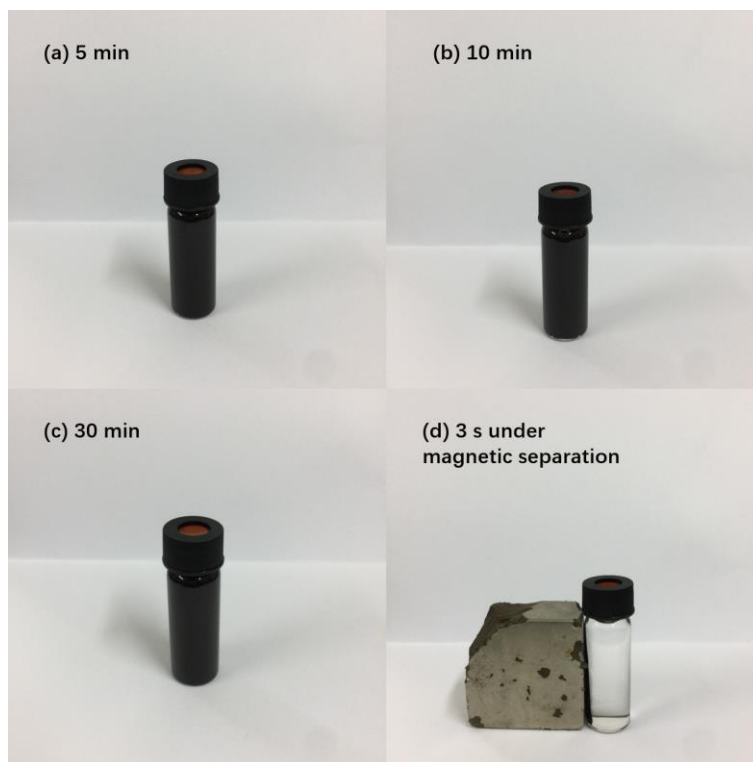

3

4 **Figure S5.** MOFs dispersion in water solution: (a) 5 min, (b) 10 min, (c) 30 min, and (d) 3 s  
5 under magnetic separation.

6

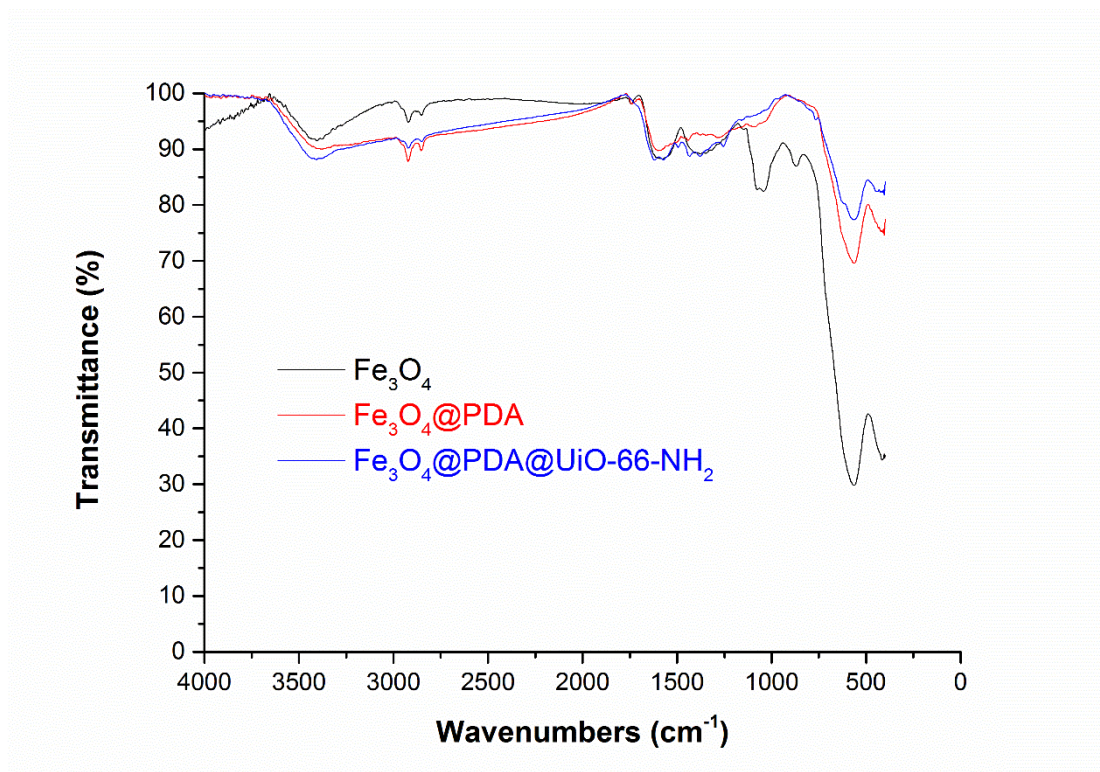

7

8 **Figure S6.** FT-IR spectra of  $\text{Fe}_3\text{O}_4$ ,  $\text{Fe}_3\text{O}_4@PDA$  and  $\text{Fe}_3\text{O}_4@PDA@UiO-66-NH_2$ .



1

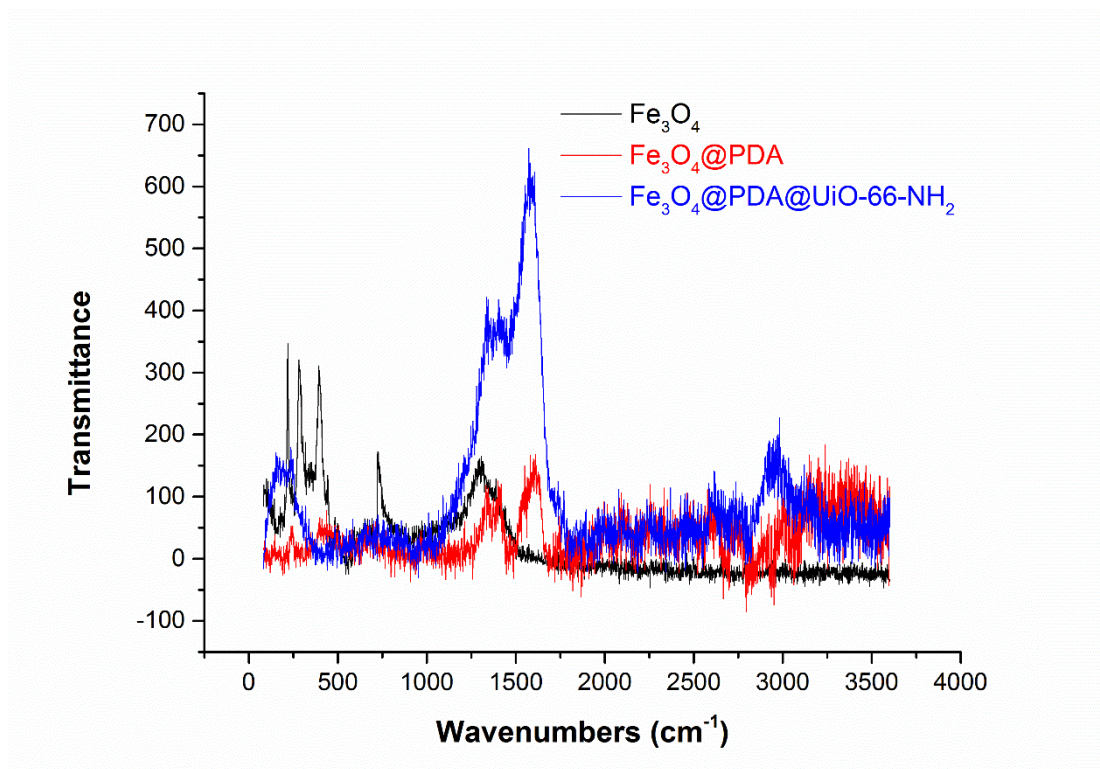

2

3

Figure S7. Raman spectra of Fe<sub>3</sub>O<sub>4</sub>, Fe<sub>3</sub>O<sub>4</sub>@PDA and Fe<sub>3</sub>O<sub>4</sub>@PDA@UiO-66-NH<sub>2</sub>.

4

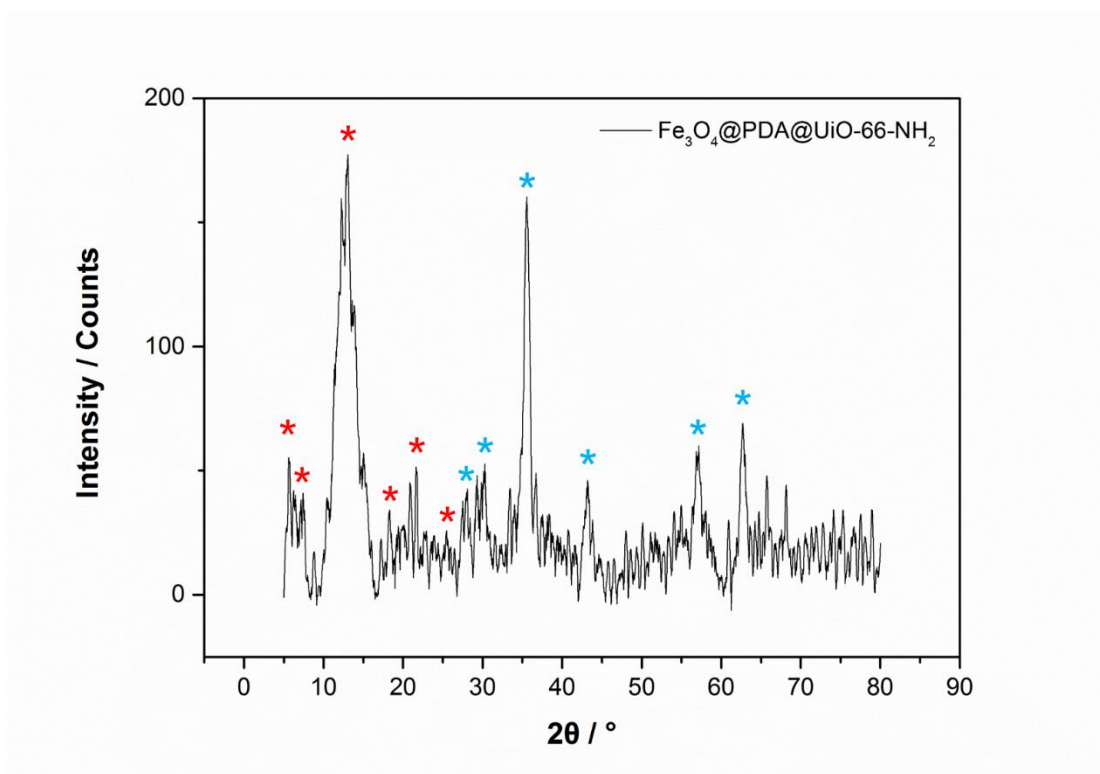

5

6

Figure S8. XRD patterns of Fe<sub>3</sub>O<sub>4</sub>@PDA@UiO-66-NH<sub>2</sub>. Peaks from UiO-66-MOF were marked with \* in red, while peaks from Fe<sub>3</sub>O<sub>4</sub> were marked with \* in blue.

8



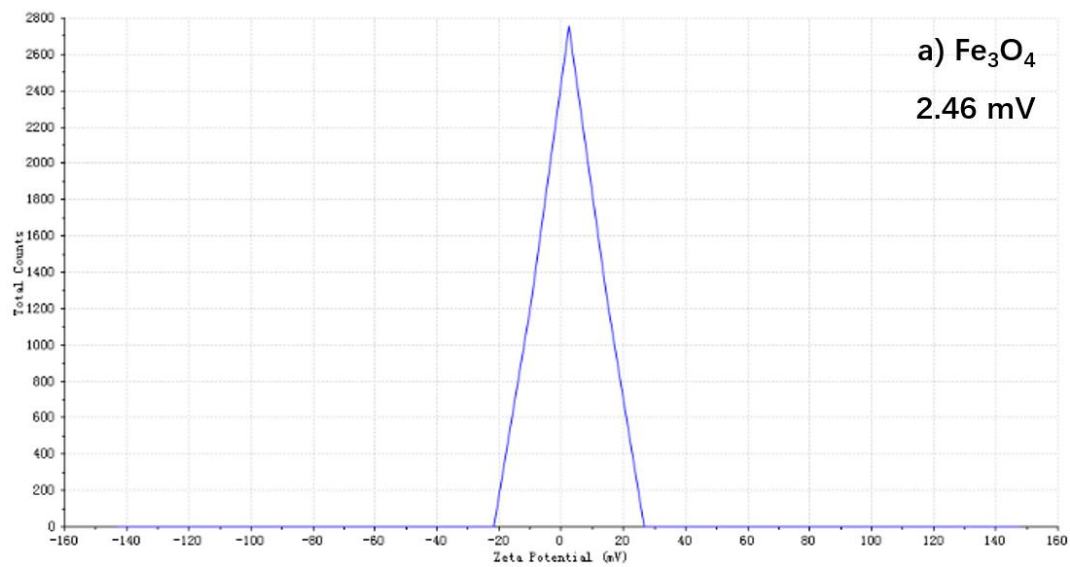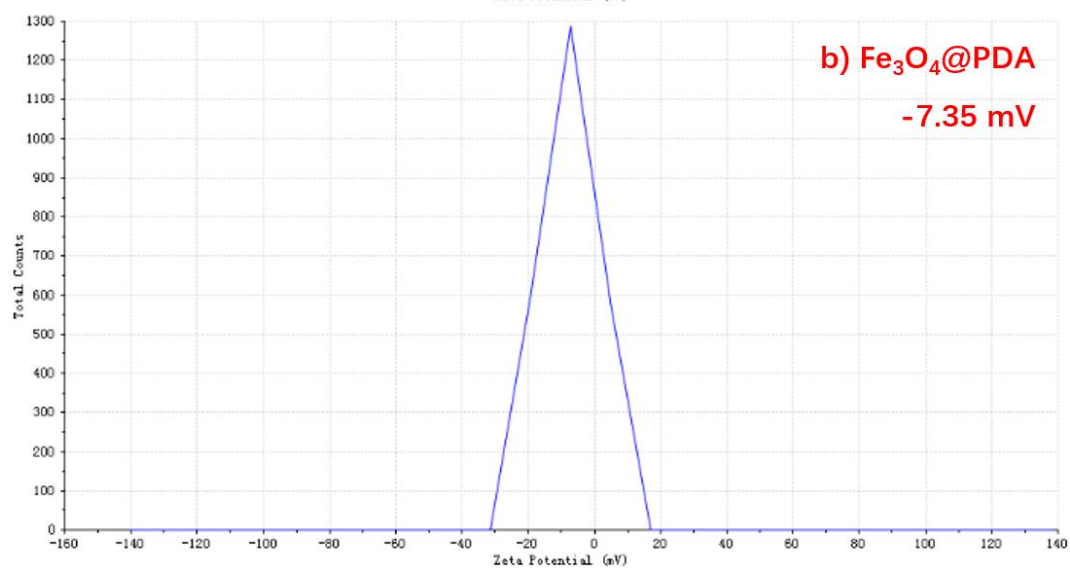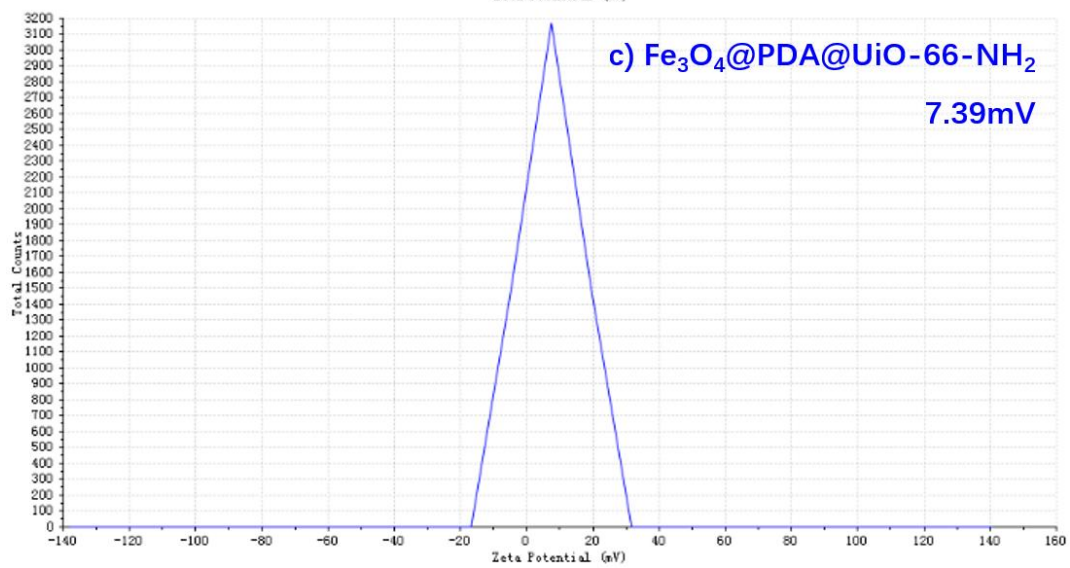

1  
2 **Figure S9.** Zeta potential distributions of (a)  $\text{Fe}_3\text{O}_4$ , (b)  $\text{Fe}_3\text{O}_4@\text{PDA}$  and (c)  
3  $\text{Fe}_3\text{O}_4@\text{PDA}@UiO-66-\text{NH}_2$ .

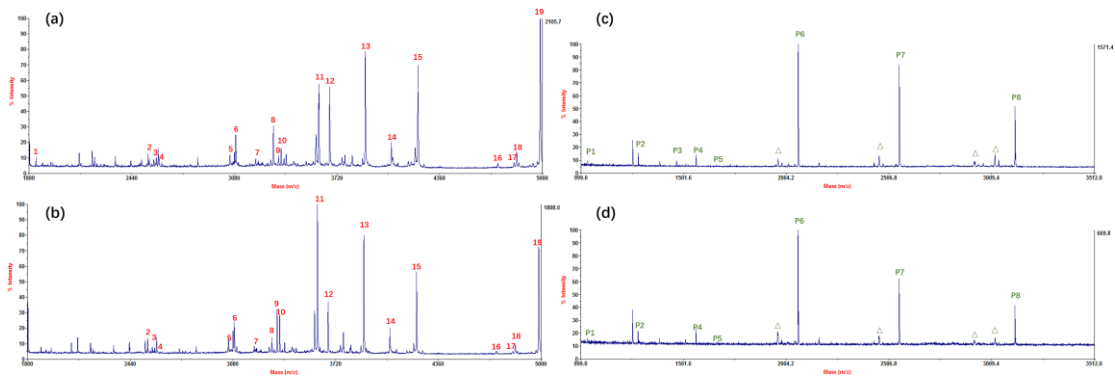

1 **Figure S10.** MALDI-TOF mass spectra for the glycopeptide enrichment from 250 fmol/ $\mu$ L  
 2 HRP tryptic digest: (a) after treatment with the first-time  $\text{Fe}_3\text{O}_4@\text{PDA}@UiO-66-\text{NH}_2$ ; (b) after  
 3 treatment with the five-times-recycled  $\text{Fe}_3\text{O}_4@\text{PDA}@UiO-66-\text{NH}_2$ ; for the phosphopeptide  
 4 enrichment from 200 fmol/ $\mu$ L  $\beta$ -Casein tryptic digest: (c) after treatment with the first-time  
 5  $\text{Fe}_3\text{O}_4@\text{PDA}@UiO-66-\text{NH}_2$ ; (d) after treatment with the five-times-recycled  
 6  $\text{Fe}_3\text{O}_4@\text{PDA}@UiO-66-\text{NH}_2$ , where glycopeptides were marked with Arabic Numerals in red,  
 7 phosphopeptides were marked with Arabic Numerals in green, and  $\Delta$  indicates the losses  
 8 of phosphoric acid.  
 9

10

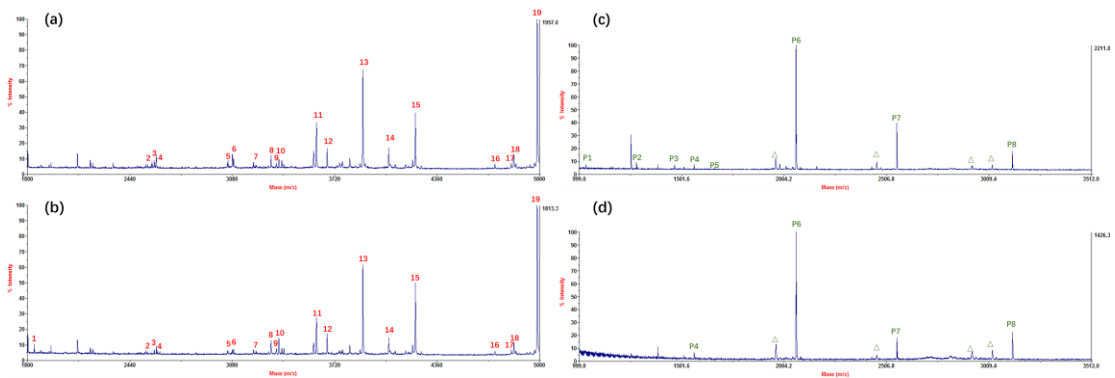

11 **Figure S11.** MALDI-TOF mass spectra for the glycopeptide enrichment from 250 fmol/ $\mu$ L  
 12 HRP tryptic digest: (a) after treatment with the freshly-made  $\text{Fe}_3\text{O}_4@\text{PDA}@UiO-66-\text{NH}_2$ ; (b)  
 13 after treatment with the  $\text{Fe}_3\text{O}_4@\text{PDA}@UiO-66-\text{NH}_2$  kept at  $-20^\circ\text{C}$  for a month; for the  
 14 phosphopeptide enrichment from 200 fmol/ $\mu$ L  $\beta$ -Casein tryptic digest: (c) after treatment  
 15 with the freshly-made  $\text{Fe}_3\text{O}_4@\text{PDA}@UiO-66-\text{NH}_2$ ; (d) after treatment with the  
 16  $\text{Fe}_3\text{O}_4@\text{PDA}@UiO-66-\text{NH}_2$  kept at  $-20^\circ\text{C}$  for a month, where glycopeptides were marked  
 17 with Arabic Numerals in red, phosphopeptides were marked with Arabic Numerals in green,  
 18 and  $\Delta$  indicates the losses of phosphoric acid.  
 19

20

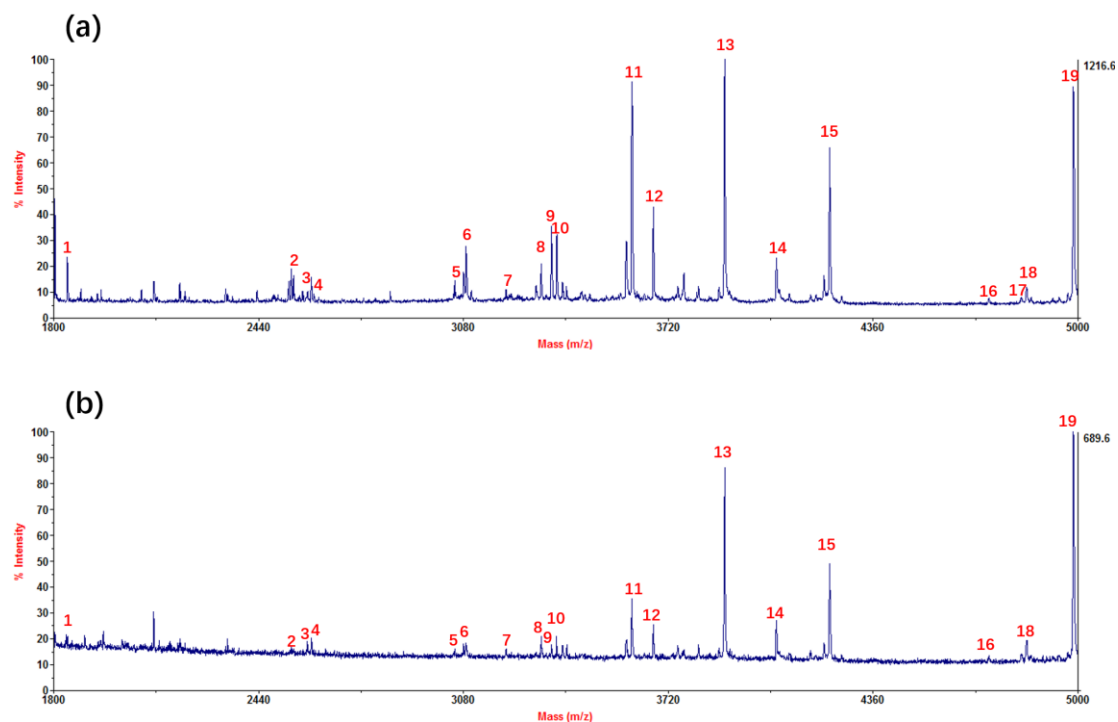

1  
 2 **Figure S12.** MALDI-TOF mass spectra for the glycopeptide enrichment from a mixture of  
 3 HRP and BSA at a mass ratio of 1: 50: (a) after enrichment; 1: 100: (b) after enrichment, where  
 4 glycopeptides were marked with Arabic Numerals in red.  
 5

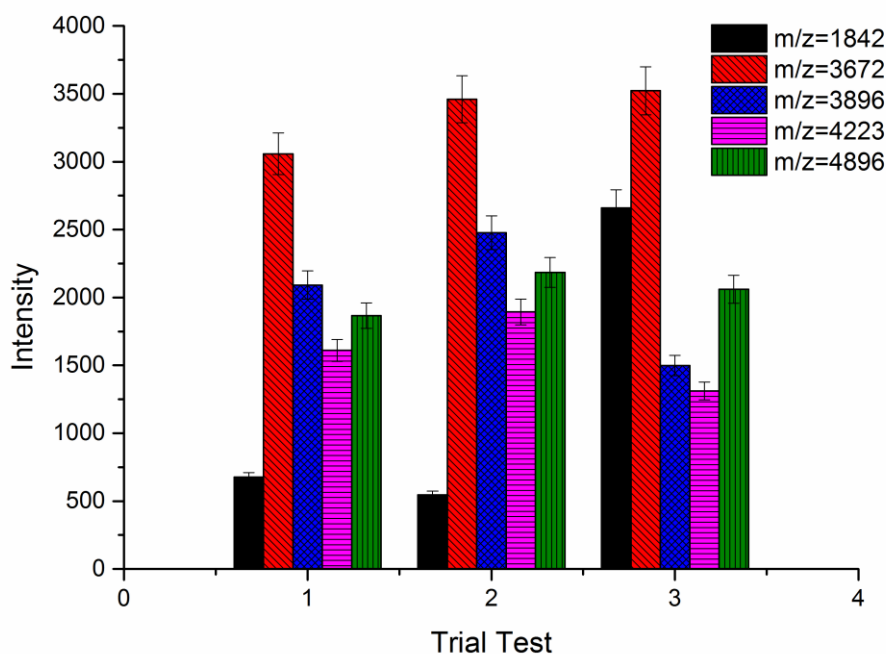

6  
 7 **Figure S13.** Recovery of the as-prepared MOFs through trial tests.  
 8

9 **Table S1.** Detailed information of glycopeptides identified from HRP digest.

| Peak No. | Observed m/z | Glycan composition                      | Glycopeptide Sequence                            |
|----------|--------------|-----------------------------------------|--------------------------------------------------|
| 1        | 1843.0       | XylMan3FucGlcNAc2                       | NVGLN#R                                          |
| 2        | 2541.4       | XylMan3FucGlcNAc2                       | SSPN#ATDTIPLVR                                   |
| 3        | 2591.4       | XylMan3FucGlcNAc2                       | PTLN#TTYLQTLR                                    |
| 4        | 2611.4       | XylMan3GlcNAc2                          | MGN#ITPLTGTOGQIR                                 |
| 5        | 3074.5       | FucGlcNAc                               | LHFHDCFVNGCDASILLDN#TTSFR                        |
| 6        | 3087.7       | XylMan3FucGlcNAc2                       | GLCPLNGN#LSALVDFDLR                              |
| 7        | 3222.9       | Man3FucGlcNAc2                          | SFAN#STQTFNFAFVEAMDR                             |
| 8        | 3321.8       | XylMan3FucGlcNAc2                       | QLTPTFYDNSCPN#VSNIVR                             |
| 9        | 3353.7       | XylMan3FucGlcNAc2                       | SFAN#STQTFNFAFVEAMDR                             |
| 10       | 3369.7       | XylMan3FucGlcNAc2                       | SFAN#STQTFNFAFVEAM*DR                            |
| 11       | 3605.0       | XylMan3FucGlcNAc2                       | NQCRGLCPLNGN#LSALVDFDLR                          |
| 12       | 3672.1       | XylMan3FucGlcNAc2                       | GLIQSDQELFSSPN#ATDTIPLVR                         |
| 13       | 3894.1       | XylMan3FucGlcNAc2                       | LHFHDCFVNGCDASILLDN#TTSFR                        |
| 14       | 4056.2       | XylMan3GlcNAc2                          | QLTPTFYDNSC(AAVESACPR)PN#VSNIVR-H <sub>2</sub> O |
| 15       | 4222.4       | XylMan3FucGlcNAc2                       | QLTPTFYDNSC(AAVESACPR)PN#VSNIVR                  |
| 16       | 4719.6       | Man3FucGlcNAc2,<br>Man3FucGlcNAc2       | LYN#FSNTGLPDPTLN#TTYLQTLR                        |
| 17       | 4821.7       | XylMan2FucGlcNAc2,<br>XylMan2GlcNAc2    | LYN#FSNTGLPDPTLN#TTYLQTLR                        |
| 18       | 4838.7       | XylMan3FucGlcNAc2,<br>XylMan3GlcNAc2    | LYN#FSNTGLPDPTLN#TTYLQTLR                        |
| 19       | 4984.7       | XylMan3FucGlcNAc2,<br>XylMan3FucGlcNAc2 | LYN#FSNTGLPDPTLN#TTYLQTLR                        |

1

2 **Table S2.** Detailed information of glycopeptides identified from IgG digest.

| Peak No. | Observed m/z | Glycan composition    | Glycopeptide Sequence |
|----------|--------------|-----------------------|-----------------------|
| l1       | 2399.3       | [Hex]3[HexNAc]3[Fuc]1 | EEQFN#STFR            |
| l2       | 2431.3       | [Hex]3[HexNAc]3[Fuc]1 | EEQYN#STYR            |
| l3       | 2457.3       | [Hex]3[HexNAc]4       | EEQFN#STFR            |
| l4       | 2488.3       | [Hex]3[HexNAc]4       | EEQYN#STYR            |
| l5       | 2561.4       | [Hex]4[HexNAc]3[Fuc]1 | EEQFN#STFR            |
| l6       | 2602.4       | [Hex]3[HexNAc]4[Fuc]1 | EEQFN#STFR            |
| l7       | 2618.4       | [Hex]4[HexNAc]4       | EEQFN#STFR            |
| l8       | 2634.4       | [Hex]3[HexNAc]4[Fuc]1 | EEQYN#STYR            |
| l9       | 2650.4       | [Hex]3[HexNAc]4[Fuc]1 | EEQYN#STYR            |
| l10      | 2764.5       | [Hex]4[HexNAc]4[Fuc]1 | EEQFN#STFR            |
| l11      | 2781.5       | [Hex]5[HexNAc]4       | EEQFN#STFR            |
| l12      | 2796.5       | [Hex]4[HexNAc]4[Fuc]1 | EEQYN#STYR            |
| l13      | 2805.5       | [Hex]3[HexNAc]5[Fuc]1 | EEQFN#STFR            |
| l14      | 2837.5       | [Hex]3[HexNAc]5[Fuc]1 | EEQYN#STYR            |

|     |        |                       |                     |
|-----|--------|-----------------------|---------------------|
| I15 | 2853.5 | [Hex]4[HexNAc]5       | EEQY <b>N</b> #STYR |
| I16 | 2926.6 | [Hex]5[HexNAc]4[Fuc]1 | EEQF <b>N</b> #STFR |
| I17 | 2958.6 | [Hex]5[HexNAc]4[Fuc]1 | EEQY <b>N</b> #STYR |
| I18 | 2967.6 | [Hex]4[HexNAc]5[Fuc]1 | EEQF <b>N</b> #STFR |
| I19 | 3000.0 | [Hex]4[HexNAc]5[Fuc]1 | EEQY <b>N</b> #STYR |
| I20 | 3130.0 | [Hex]5[HexNAc]5[Fuc]1 | EEQF <b>N</b> #STFR |
| I21 | 3161.7 | [Hex]5[HexNAc]5[Fuc]1 | EEQY <b>N</b> #STYR |

1

2 **Table S3.** Detailed information of phosphopeptides identified from  $\beta$ -Casein digest.

| Peak No. | Observed m/z | Protein              | Phosphopeptide Sequence       |
|----------|--------------|----------------------|-------------------------------|
| P1       | 1031.3785    | $\beta$ /33-48       | FQpSEEQQQTEDELQDK             |
| P2       | 1279.1156    | $\beta$ /33-52       | FQpSEEQQQTEDELQDKIHFP         |
| P3       | 1466.6918    | $\alpha$ -S2/138-149 | TVDMEpSTEVFTK                 |
| P4       | 1561.2365    | $\beta$ /1-25        | RELEELNVPGEIVEpSLpSpSpSEESITR |
| P5       | 1660.9084    | $\alpha$ -S1/106-119 | VPQLEIVPNpSAEER               |
| P6       | 2061.9438    | $\beta$ /33-48       | FQpSEEQQQTEDELQDK             |
| P7       | 2556.2473    | $\beta$ /33-52       | FQpSEEQQQTEDELQDKIHFP         |
| P8       | 3122.4907    | $\beta$ /1-25        | RELEELNVPGEIVEpSLpSpSpSEESITR |

3

4 **Table S4.** Detailed information of glycopeptides identified from human serum.

| Peak No. | Protein Group Accessions | Sequence                         | MH+ [Da]  |
|----------|--------------------------|----------------------------------|-----------|
| 1        |                          | VTPAcnTSLPAQR                    | 1415.6951 |
| 2        |                          | EIKNnQTEK                        | 1104.5535 |
| 3        |                          | THTnISESHpNATFSAVGEASlcEDDWDSGER | 3521.4865 |
| 4        |                          | DGQLLPSSnYSNIK                   | 1536.7543 |
| 5        |                          | nISLQLmSNMNISnK                  | 1724.8188 |
| 6        | O00187                   | VVINSnITPlcLPR                   | 1596.8781 |
| 7        | O75882                   | ISnSSDTVEcEcSENWK                | 2045.8062 |
| 8        |                          | IDSTGnVTNELR                     | 1319.6438 |
| 9        |                          | nHScSEGQISIFR                    | 1535.6901 |
| 10       |                          | clnQSlcEK                        | 1152.5010 |
| 11       |                          | GlcNSSDVR                        | 1008.4411 |

|    |               |                                |           |
|----|---------------|--------------------------------|-----------|
|    |               |                                | 5         |
|    |               | AATcINPLnGSVcERPAnHSAK         | 2369.0978 |
| 12 |               |                                | 0         |
|    | O95445        | TELFSSScPGGIMLnETGQGYQR        | 2533.1357 |
| 13 |               |                                | 8         |
|    | O95497        | LTGVAGnYTVcQK                  | 1411.6899 |
| 14 |               |                                | 9         |
|    | P00450        | EnLTAPGSDSAVFFEQGTTR           | 2127.9832 |
| 15 |               |                                | 5         |
|    |               | ELHHLQEQnVSNAFLDK              | 2022.9906 |
| 16 |               |                                | 5         |
|    |               | EHEGAIYPDnTTDFQR               | 1893.8263 |
| 17 |               |                                | 4         |
|    |               | ELHHLQEQnVSnAFLDK              | 2023.9727 |
| 18 |               |                                | 5         |
|    | P00734        | SEGSSVnLSPPLEQcVPDR            | 2071.9641 |
| 19 |               |                                | 6         |
| 20 |               | GHVnITR                        | 797.42632 |
| 21 | P00736        | cnYSIR                         | 813.35637 |
|    | P00738        | VWLHPnYSQVDIGLIK               | 1795.9957 |
| 22 |               |                                | 8         |
|    |               | VWLHPnYSQVDIGLIK               | 2037.1755 |
| 23 |               |                                | 7         |
|    |               | QLVEIEKVLHPnYSQVDIGLIK         | 2635.4671 |
| 24 |               |                                | 8         |
|    | P00739;P00738 | NLFLnHSEnATAK                  | 1460.7019 |
| 25 |               |                                | 5         |
|    |               | NLFLnHSEnATAK                  | 1459.7179 |
| 26 |               |                                | 4         |
|    |               | nLFLnHSEnATAK                  | 1461.6869 |
| 27 |               |                                | 4         |
|    |               | MVSHHnLTTGATLINEQWLLTTAK       | 2680.3734 |
| 28 |               |                                | 3         |
|    |               | mVSHHnLTTGATLINEQWLLTTAK       | 2696.3773 |
| 29 |               |                                | 4         |
|    |               | mVSHHnLTTGATLnEQWLLTTAK        | 2697.3746 |
| 30 |               |                                | 5         |
| 31 | P00742        | GDnnLTR                        | 791.35204 |
| 32 |               | GDNnLTR                        | 790.36858 |
|    | P00748        | RnHScEPcQTLAVR                 | 1728.7913 |
| 33 |               |                                | 5         |
|    | P00751        | IVLDPSGSmNIYLVLDGSDSIGASnFTGAK | 3058.4862 |
| 34 |               |                                | 4         |
| 35 | P01008        | LGAcnDTLQQLMEVFK               | 1867.8914 |



|    |        |                                   |           |
|----|--------|-----------------------------------|-----------|
|    |        |                                   | 1         |
|    |        | LGAcnDTLQQLmEVFK                  | 1883.8915 |
| 36 |        |                                   | 3         |
|    |        | SLTFnETYQDISELVYGAK               | 2179.0455 |
| 37 |        |                                   | 1         |
|    |        | LGAcnDTLQQLMEVFKFDTISEK           | 2688.2898 |
| 38 |        |                                   | 3         |
|    |        | WVSnKTEGR                         | 1077.5322 |
| 39 |        |                                   | 6         |
|    | P01009 | YLGnATAIFFLPDEGK                  | 1756.8804 |
| 40 |        |                                   | 2         |
|    |        | ADTHDEILEGLNFnLTEIPEAQIHEGFQELLR  | 3692.8084 |
| 41 |        |                                   | 9         |
|    | P01011 | TlnQSSDELQLSMGNAMFVK              | 2214.0454 |
| 42 |        |                                   | 6         |
|    |        | YTGnASALFILPDQDK                  | 1753.8652 |
| 43 |        |                                   | 8         |
|    |        | FnLTETSEAEIHQSFQHLLR              | 2401.1797 |
| 44 |        |                                   | 2         |
|    |        | TlnQSSDELQLSmGNAMFVK              | 2230.0361 |
| 45 |        |                                   | 7         |
|    |        | LlnDYVKnGTR                       | 1294.6644 |
| 46 |        |                                   | 8         |
|    | P01019 | LQAILGVPWKDKncTSR                 | 1987.0412 |
| 47 |        |                                   | 9         |
|    |        | DKncTSR                           | 881.37828 |
| 48 |        |                                   |           |
|    | P01023 | GcVLLSYLnETVTVSASLESVR            | 2398.2209 |
| 49 |        |                                   | 9         |
|    |        | VSnQTLSLFFTVLQDVPVR               | 2164.1643 |
| 50 |        |                                   | 5         |
|    |        | SLGNVnFTVSAEALESQELcGTEVPSVPEHGR  | 3414.6152 |
| 51 |        |                                   | 1         |
|    |        | SLGNVnFTVSAEALESQELcGTEVPSVPEHGRK | 3542.7115 |
| 52 |        |                                   | 7         |
|    |        | SLGnVnFTVSAEALESQELcGTEVPSVPEHGR  | 3415.6136 |
| 53 |        |                                   | 7         |
|    |        | SLGnVnFTVSAEALESQELcGTEVPSVPEHGRK | 3543.7155 |
| 54 |        |                                   | 5         |
|    | P01024 | TVLTPATNHMGnVTFTIPANR             | 2256.1449 |
| 55 |        |                                   | 9         |
|    |        | TVLTPATNHmGnVTFTIPANR             | 2272.1426 |
| 56 |        |                                   | 3         |
|    |        | TVLTPATnHMGnVTFTIPANR             | 2257.1282 |
| 57 |        |                                   | 7         |

|    |        |                                  |           |
|----|--------|----------------------------------|-----------|
|    |        | TVLTPATnHmGnVTFTIPANR            | 2273.1183 |
| 58 |        |                                  | 2         |
|    | P01033 | FVGTPEVnQTTLYQR                  | 1753.8795 |
| 59 |        |                                  | 6         |
|    | P01042 | YNSQnQSNNQFVLYR                  | 1875.8635 |
| 60 |        |                                  | 7         |
|    |        | LnAENnATFYFK                     | 1433.6580 |
| 61 |        |                                  | 1         |
|    |        | LNAENnATFYFK                     | 1432.6747 |
| 62 |        |                                  | 3         |
|    | P01591 | EnISDPTSPLR                      | 1229.6012 |
| 63 |        |                                  | 4         |
|    |        | IIVPLNNREnISDPTSPLR              | 2149.1588 |
| 64 |        |                                  | 5         |
|    |        | IIVPLnNREnISDPTSPLR              | 2150.1456 |
| 65 |        |                                  | 0         |
|    | P01833 | AnLTNFPENGTFVWnIAQLSQDDSGR       | 2809.3282 |
| 66 |        |                                  | 2         |
|    |        | LSLLEEPGnGTFTVILNQLTSR           | 2403.2744 |
| 67 |        |                                  | 5         |
|    |        | AnLTnFPEnGTFVWNIAQLSQDDSGR       | 2810.3315 |
| 68 |        |                                  | 9         |
|    | P01857 | EEQYnSTYR                        | 1190.4952 |
| 69 |        |                                  | 9         |
|    |        | TKPREEQYnSTYR                    | 1672.7929 |
| 70 |        |                                  | 4         |
|    | P01859 | EEQFnSTFR                        | 1158.5064 |
| 71 |        |                                  | 0         |
|    |        | TKPREEQFnSTFR                    | 1640.8029 |
| 72 |        |                                  | 5         |
|    | P01860 | EEQYnSTFR                        | 1174.5011 |
| 73 |        |                                  | 5         |
|    | P01861 | EEQFnSTYR                        | 1174.5013 |
| 74 |        |                                  | 9         |
|    | P01871 | GLTFQQnASSMcVPDQDTAIR            | 2340.0530 |
| 75 |        |                                  | 3         |
|    |        | STGKPTLYnVSLVMSDTAGTcY           | 2366.0876 |
| 76 |        |                                  | 9         |
|    |        | GLTFQQnASSmcVPDQDTAIR            | 2356.0586 |
| 77 |        |                                  | 4         |
|    |        | THTnISESHpNATFSAVGEASlcEDDWNSGER | 3520.4833 |
| 78 |        |                                  | 0         |
| 79 |        | nNSDISSTR                        | 994.44359 |
| 80 |        | STGKPTLYnVSLVmSDTAGTcY           | 2382.0855 |

|     |               |                                   |           |
|-----|---------------|-----------------------------------|-----------|
|     |               |                                   | 0         |
|     |               | THTnISESHPhnATFSAVGEASlcEDDWnSGER | 3521.4865 |
| 81  |               |                                   | 5         |
|     | P01876        | LAGKPTHVnVSVVmAEVDGTcY            | 2364.1221 |
| 82  |               |                                   | 2         |
|     |               | LAGKPTHVnVSVVMAEVDGTcY            | 2348.1265 |
| 83  |               |                                   | 6         |
|     | P01876;P01877 | LSLHRPALEDLLLGSSEAnLTcTLTGLR      | 2964.5821 |
| 84  |               |                                   | 7         |
| 85  | P01877        | TPLTAnITK                         | 959.54088 |
|     | P02743        | ESVTDHVNLIPTLEKPLQnFTLcFR         | 2972.5206 |
| 86  |               |                                   | 5         |
|     | P02748        | AVnITSENLIDDVSLIR                 | 1972.0605 |
| 87  |               |                                   | 9         |
|     | P02749        | VYKPSAGnNSLYR                     | 1469.7380 |
| 88  |               |                                   | 4         |
|     |               | LGnWSAmPScK                       | 1267.5442 |
| 89  |               |                                   | 4         |
|     |               | LGnWSAMPScK                       | 1251.5503 |
| 90  |               |                                   | 4         |
|     |               | DTAVFEcLPQHAMFGnDTITcTTHGnWTK     | 3354.4615 |
| 91  |               |                                   | 7         |
|     |               | DTAVFEcLPQHAmFGnDTITcTTHGnWTK     | 3370.4476 |
| 92  |               |                                   | 5         |
|     | P02750        | mFSQnDTR                          | 1015.4148 |
| 93  |               |                                   | 4         |
|     |               | LPPGLLAnFTLLR                     | 1425.8485 |
| 94  |               |                                   | 6         |
|     | P02751        | LDAPTNLQFVnETDSTVLVR              | 2233.1409 |
| 95  |               |                                   | 0         |
|     |               | DQcIVDDITYNVnDTFHK                | 2197.9724 |
| 96  |               |                                   | 6         |
|     |               | NSITLTnLTPGTEYVVSIVALnGR          | 2534.3569 |
| 97  |               |                                   | 8         |
|     | P02763        | QDQcIYnTTYLNVQR                   | 1916.8814 |
| 98  |               |                                   | 0         |
|     |               | QDQcIYnTTYLnVQR                   | 1917.8683 |
| 99  |               |                                   | 3         |
| 100 |               | EnGTISR                           | 777.37401 |
|     | P02765        | KVcQDcPLLAPLnDTR                  | 1900.9207 |
| 101 |               |                                   | 0         |
|     |               | AALAAFNAQnNgsNFQLEEISR            | 2366.1387 |
| 102 |               |                                   | 2         |
| 103 |               | AALAAFNAQnnGsnfQLEEISR            | 2367.1272 |

|     |        |                                      |           |
|-----|--------|--------------------------------------|-----------|
|     |        |                                      | 4         |
|     |        | VcQDcPLLAPLnDTR                      | 1772.8339 |
| 104 |        |                                      | 1         |
| 105 | P02774 | LcDnLSTK                             | 951.44542 |
|     | P02786 | DFEDLYTPVnGSIVIVR                    | 1937.9877 |
| 106 |        |                                      | 2         |
|     |        | KDFEDLYTPVnGSIVIVR                   | 2066.0824 |
| 107 |        |                                      | 3         |
|     | P02787 | QQQHFLFGSnVTDcSGnFcLFR               | 2516.1099 |
| 108 |        |                                      | 0         |
|     |        | QQQHFLFGSnVTDcSGnFcLFR               | 2517.0946 |
| 109 |        |                                      | 4         |
|     | P02790 | ALPQPQnVTSLLGcTH                     | 1736.8638 |
| 110 |        |                                      | 2         |
|     |        | SWPAVGncSSALR                        | 1405.6532 |
| 111 |        |                                      | 5         |
|     |        | cSDGWSFDATTLDDnGTMLFFK               | 2529.0574 |
| 112 |        |                                      | 2         |
|     |        | LNAAKALPQPQnVTSLLGcTH                | 2234.1635 |
| 113 |        |                                      | 5         |
|     |        | nGTGHGnSTHHGPEYmR                    | 1869.7582 |
| 114 |        |                                      | 0         |
|     | P03951 | LETTVnYTDSQRPIcLPSK                  | 2223.0977 |
| 115 |        |                                      | 0         |
|     |        | VYSGILnQSEIK                         | 1351.7114 |
| 116 |        |                                      | 7         |
|     |        | LETTVnYTDSQRPIcLPSKGDR               | 2551.2450 |
| 117 |        |                                      | 9         |
|     |        | GINYnSSVAK                           | 1053.5209 |
| 118 |        |                                      | 2         |
|     | P03952 | IYPGVDFGGEELnVTFVK                   | 1984.9900 |
| 119 |        |                                      | 4         |
|     |        | IYSGILnLSDITK                        | 1437.7838 |
| 120 |        |                                      | 6         |
|     |        | LQAPLnYTEFQKPIcLPSK                  | 2248.1685 |
| 121 |        |                                      | 0         |
|     |        | IVGGTnSSWGEWPWQVSLQVK                | 2359.1726 |
| 122 |        |                                      | 6         |
| 123 |        | GVNFnVSK                             | 865.44145 |
|     | P04003 | LSVDKDQYVEPEnVTIQcDSGYGVVGPQSITcSGnR | 3973.8152 |
| 124 |        |                                      | 8         |
|     |        | LSVDKDQYVEPEnVTIQcDSGYGVVGPQSITcSGNR | 3972.8268 |
| 125 |        |                                      | 8         |
| 126 | P04004 | NnATVHEQVGGPSLTSDLQAQSK              | 2382.1563 |

|     |        |                                   |           |
|-----|--------|-----------------------------------|-----------|
|     |        |                                   | 5         |
|     |        | nnATVHEQVGGPSLTSDLQAQSK           | 2383.1442 |
| 127 |        |                                   | 0         |
|     | P04070 | EVFVHPnYSK                        | 1220.5947 |
| 128 |        |                                   | 7         |
|     | P04114 | FnSSYLQGTnQITGR                   | 1686.8085 |
| 129 |        |                                   | 2         |
|     |        | FnSSYLQGTnQITGR                   | 1687.7964 |
| 130 |        |                                   | 3         |
|     |        | FVEGSHnSTVSLTTK                   | 1607.7916 |
| 131 |        |                                   | 7         |
|     |        | YDFnSSMLYSTAK                     | 1527.6676 |
| 132 |        |                                   | 5         |
|     |        | QVLFLDTVYGncSTHFTVK               | 2230.0803 |
| 133 |        |                                   | 0         |
|     |        | YDFnSSmLYSTAK                     | 1543.6611 |
| 134 |        |                                   | 8         |
|     |        | FEVDSPVYnATWSASLK                 | 1914.9183 |
| 135 |        |                                   | 8         |
|     |        | QVFPGLNYcTSGAYSnASSTDSASYPLTGDTR  | 3551.5572 |
| 136 |        |                                   | 2         |
|     |        | IQSPLFTLDAnADIGnGTTSANEAGIAASITAK | 3234.6265 |
| 137 |        |                                   | 6         |
|     | P04180 | AELSnHTRPVILVPGcLGNQLEAK          | 2617.3763 |
| 138 |        |                                   | 6         |
|     | P04196 | VIDFncTTSSVSSALANTK               | 2015.9597 |
| 139 |        |                                   | 6         |
|     |        | VIDFncTTSSVSSALAnTK               | 2016.9436 |
| 140 |        |                                   | 5         |
|     | P05090 | ADGTVNQIEGEATPVnLTEPAK            | 2255.1123 |
| 141 |        |                                   | 5         |
|     |        | ADGTVnQIEGEATPVnLTEPAK            | 2256.0894 |
| 142 |        |                                   | 0         |
|     |        | ADGTVNQIEGEATPVnLTEPAKLEVK        | 2724.3943 |
| 143 |        |                                   | 8         |
|     |        | clQAnYSLMENGK                     | 1528.6774 |
| 144 |        |                                   | 2         |
|     |        | ADGTVnQIEGEATPVnLTEPAKLEVK        | 2725.3760 |
| 145 |        |                                   | 1         |
|     | P05155 | VLSnNSDANLELINTWVAK               | 2102.0789 |
| 146 |        |                                   | 1         |
|     |        | DTFVnASR                          | 910.42650 |
| 147 |        |                                   |           |
|     |        | VGQLQLSHnLSLVILVPQNLK             | 2314.3492 |
| 148 |        |                                   | 8         |

|     |        |                       |           |
|-----|--------|-----------------------|-----------|
| 149 | P05156 | FLNnGTcTAEGK          | 1312.5839 |
|     |        |                       | 1         |
| 150 |        | FLnGTcTAEGK           | 1313.5684 |
|     |        |                       | 1         |
| 151 |        | LSDLSInSTEcLHVHcR     | 2041.9449 |
|     |        |                       | 7         |
| 152 |        | nGTAVcATNR            | 1064.4795 |
|     |        |                       | 4         |
| 153 |        | nGTAVcATNRR           | 1220.5803 |
|     |        |                       | 0         |
| 154 | P05160 | EHETcLAPELYnGnYSTTQK  | 2357.0262 |
|     |        |                       | 2         |
| 155 |        | EHETcLAPELYNGnYSTTQK  | 2356.0380 |
|     |        |                       | 0         |
| 156 | P05362 | AnLTVVLLR             | 999.61992 |
|     |        | LNPTVTYnGnDSFSAK      | 1614.7657 |
| 157 |        |                       | 9         |
| 158 | P05543 | VTAcHSSQPnATLYK       | 1677.7904 |
|     |        |                       | 5         |
| 159 |        | TLYETEVSFSTDFSnISAAK  | 2124.0039 |
|     |        |                       | 5         |
| 160 | P05546 | DFVnASSKYEITTIHNLFR   | 2256.1266 |
|     |        |                       | 1         |
| 161 |        | nLSMPLLPAADFHK        | 1483.7610 |
|     |        |                       | 8         |
| 162 |        | DFVnASSK              | 868.40434 |
| 163 | P06276 | EnETEIIK              | 976.48265 |
|     |        | DnYTKAEEILSR          | 1439.7006 |
| 164 |        |                       | 9         |
| 165 |        | DnNSIITR              | 933.46343 |
| 166 | P06681 | QSVPAHFVALnGSK        | 1455.7595 |
|     |        |                       | 7         |
| 167 |        | LTDTIcGVGnMSAnASDQER  | 2140.9092 |
|     |        |                       | 3         |
| 168 |        | LGSYPVGGnVSFEcEDGFILR | 2317.0896 |
|     |        |                       | 5         |
| 169 |        | LTDTIcGVGnmSAnASDQER  | 2156.9077 |
|     |        |                       | 6         |
| 170 |        | TmFPnLTDVR            | 1210.5774 |
|     |        |                       | 4         |
| 171 | P07602 | TnSTFVQALVEHVKEEcDR   | 2263.0663 |
|     |        |                       | 0         |
| 172 | P07996 | VVnSTTGPGEHLR         | 1367.6915 |
|     |        |                       | 3         |



|     |               |                                |           |
|-----|---------------|--------------------------------|-----------|
| 173 |               | VScPIMPcSnATVPDGEccPR          | 2407.9844 |
|     |               |                                | 7         |
|     | P08185        | AVLQLNEEGVDTAGSTGVTLnLTSKPIILR | 3110.6927 |
| 174 |               |                                | 2         |
|     |               | AQLLQGLGFnLTER                 | 1560.8376 |
| 175 |               |                                | 9         |
|     | P08603        | ISEEnETTcYMGK                  | 1562.6356 |
| 176 |               |                                | 7         |
|     |               | MDGASnVTclNSR                  | 1425.6104 |
| 177 |               |                                | 0         |
|     |               | IPcSQPPQIEHGTlnSSR             | 2021.9713 |
| 178 |               |                                | 6         |
|     |               | ISEEnETTcYmGK                  | 1578.6290 |
| 179 |               |                                | 8         |
|     |               | MDGASnVTclnSR                  | 1426.5930 |
| 180 |               |                                | 7         |
|     |               | SPDVlnGSPISQK                  | 1342.6854 |
| 181 |               |                                | 7         |
|     | P0C0L5;P0C0L4 | FSDGLESnSSTQFEVK               | 1775.7980 |
| 182 |               |                                | 2         |
|     |               | nTTcQDLQIEVTVK                 | 1649.8097 |
| 183 |               |                                | 4         |
|     |               | GLnVTLsSTGRnGFK                | 1552.7969 |
| 184 |               |                                | 2         |
|     |               | FSDGLESnSSTQFEVKK              | 1903.8969 |
| 185 |               |                                | 0         |
|     |               | GLnVTLsSTGR                    | 1105.5850 |
| 186 |               |                                | 1         |
| 187 | P10643        | nYTLTGR                        | 825.40990 |
| 188 | P10721        | SEnESNIR                       | 949.42266 |
|     | P10909        | LAnLTQGEDQYYLR                 | 1684.8182 |
| 189 |               |                                | 8         |
|     |               | mLnTSSLLEQLNEQFNWVSR           | 2426.1709 |
| 190 |               |                                | 5         |
|     |               | MLnTSSLLEQLNEQFNWVSR           | 2410.1705 |
| 191 |               |                                | 7         |
|     |               | KKEDALnETR                     | 1204.6176 |
| 192 |               |                                | 0         |
|     |               | KEDALnETR                      | 1076.5221 |
| 193 |               |                                | 4         |
| 194 |               | EDALnETR                       | 948.42717 |
|     |               | EDALnETRESETK                  | 1522.6871 |
| 195 |               |                                | 8         |
| 196 |               | ELPGVcnETMMALWEEcKpCLK         | 2696.1917 |

|     |        |                                   |           |
|-----|--------|-----------------------------------|-----------|
|     |        |                                   | 5         |
| 197 |        | HnSTGcLR                          | 945.42052 |
| 198 | P11362 | HIEVnGSK                          | 884.44713 |
|     | P11597 | SIDVSIQnVSVVFK                    | 1535.8312 |
| 199 |        |                                   | 2         |
| 200 | P12259 | TNIInSSR                          | 792.38402 |
|     |        | NSVLnSSTAIEHSSPYSEDPIEDPLQPDVTGIR | 3455.6095 |
| 201 |        |                                   | 9         |
|     | P13473 | VASVININPnTTHSTGScR               | 2028.9780 |
| 202 |        |                                   | 7         |
| 203 |        | LnSSTIK                           | 763.41954 |
|     | P13598 | GnETLHYETFGK                      | 1396.6392 |
| 204 |        |                                   | 1         |
| 205 | P13671 | VLnFTTK                           | 823.45543 |
| 206 |        | LSSnSTK                           | 737.36778 |
|     | P14151 | DnYTDLVAIQNK                      | 1394.6788 |
| 207 |        |                                   | 8         |
|     |        | FcRDnYTDLVAIQNK                   | 1857.8799 |
| 208 |        |                                   | 8         |
|     | P15144 | nATLVNEADKLR                      | 1344.7117 |
| 209 |        |                                   | 2         |
|     | P17936 | AYLLPAPPAPGnASESEEDR              | 2084.9785 |
| 210 |        |                                   | 6         |
|     |        | GLcVnASAVSR                       | 1134.5574 |
| 211 |        |                                   | 2         |
|     |        | VDYESQSTDTQnFSSESQR               | 2208.9475 |
| 212 |        |                                   | 4         |
|     | P19652 | QnQcFYnSSYLNVQR                   | 1921.8510 |
| 213 |        |                                   | 0         |
|     |        | QnQcFYnSSYLNVQR                   | 1922.8357 |
| 214 |        |                                   | 4         |
| 215 |        | EnGTVSR                           | 763.35808 |
|     |        | EnGTVSRYEGGR                      | 1325.6084 |
| 216 |        |                                   | 0         |
|     | P19823 | GAFISnFSMTVDGK                    | 1474.6886 |
| 217 |        |                                   | 5         |
|     |        | GAFISnFSmTVDGK                    | 1490.6837 |
| 218 |        |                                   | 6         |
|     | P20851 | LGHcPDPVLVNGEFSSSGPVnVSDK         | 2612.2325 |
| 219 |        |                                   | 8         |
|     |        | LGHcPDPVLVnGEFSSSGPVnVSDK         | 2613.2110 |
| 220 |        |                                   | 9         |
|     |        | EWDnTTTEcR                        | 1312.5111 |
| 221 |        |                                   | 6         |

|     |        |                          |           |
|-----|--------|--------------------------|-----------|
| 222 |        | TLFcnASK                 | 941.43877 |
|     |        | TLFcnASKEWDnTTTEcR       | 2234.9305 |
| 223 |        |                          | 8         |
|     |        | KTLFcnASK                | 1069.5334 |
| 224 |        |                          | 8         |
|     | P22792 | LYLGSNnLTALHPALFQnLSK    | 2316.2200 |
| 225 |        |                          | 2         |
|     |        | AFGSNPnLTK               | 1049.5264 |
| 226 |        |                          | 1         |
|     |        | LYLGSnLTALHPALFQnLSK     | 2317.2095 |
| 227 |        |                          | 7         |
|     | P23142 | cATPHGDnASLEATFVK        | 1818.8312 |
| 228 |        |                          | 7         |
|     | P25311 | DIVEYYNDSnGSHVLQGR       | 2066.9485 |
| 229 |        |                          | 3         |
|     |        | DIVEYYnDSnGSHVLQGR       | 2067.9280 |
| 230 |        |                          | 3         |
|     | P26927 | GTAnTTTAGVPcQR           | 1434.6661 |
| 231 |        |                          | 9         |
|     |        | GTGnDTVLNVALLNVISNQEcNIK | 2587.3036 |
| 232 |        |                          | 8         |
|     | P27169 | VTQVYAEEnGTVLQGSTVASVYK  | 2315.1785 |
| 233 |        |                          | 1         |
|     |        | HAnWTLTPLK               | 1181.6304 |
| 234 |        |                          | 2         |
|     | P29622 | SQILEGLGFnLTELSESDVHR    | 2345.1609 |
| 235 |        |                          | 4         |
|     |        | FLnDTMAVYEAk             | 1402.6564 |
| 236 |        |                          | 2         |
|     |        | DFYVDEnTTVR              | 1359.6080 |
| 237 |        |                          | 8         |
|     | P35858 | AGAFLGLTNVAVmnLSGNcLR    | 2195.1021 |
| 238 |        |                          | 0         |
|     |        | AGAFLGLTNVAVMnLSGNcLR    | 2179.1002 |
| 239 |        |                          | 5         |
|     | P36955 | VTQnLTLIEESLTSEFIHDIDR   | 2574.2903 |
| 240 |        |                          | 3         |
|     | P36980 | LQNNENnIScVER            | 1590.7179 |
| 241 |        |                          | 4         |
|     |        | LQNNEnnIScVER            | 1591.7036 |
| 242 |        |                          | 6         |
|     | P40197 | LLDLSGNnLTHLPK           | 1535.8425 |
| 243 |        |                          | 0         |
| 244 | P41222 | SVVAPATDGGLnLTSTFLR      | 1920.0063 |

|     |        |                                             |           |
|-----|--------|---------------------------------------------|-----------|
|     |        |                                             | 8         |
|     | P43251 | YQFNTNVVFSNnGTLVDR                          | 2088.9988 |
| 245 |        |                                             | 3         |
|     |        | NPVGLIGAE <sub>n</sub> ATGETDPSHSK          | 2094.9942 |
| 246 |        |                                             | 4         |
|     |        | FnDTEVLQR                                   | 1122.5432 |
| 247 |        |                                             | 6         |
|     |        | DVQIIVFPEDGIHGFnFTR                         | 2205.0983 |
| 248 |        |                                             | 0         |
|     | P43652 | YAEDKFnETTEK                                | 1475.6576 |
| 249 |        |                                             | 4         |
|     |        | DIENFnSTQK                                  | 1196.5433 |
| 250 |        |                                             | 8         |
|     |        | nccNTENPPGcYR                               | 1642.6071 |
| 251 |        |                                             | 0         |
|     |        | DIEnFnSTQK                                  | 1197.5259 |
| 252 |        |                                             | 3         |
|     |        | FnETTEK                                     | 869.38860 |
| 253 |        |                                             |           |
| 254 | P48740 | NnLTTYK                                     | 854.42546 |
|     | P49908 | EGYSnISYIVVNHQGISSR                         | 2124.0366 |
| 255 |        |                                             | 7         |
|     | P51884 | LHINHnNLTESVGPLPK                           | 1883.9974 |
| 256 |        |                                             | 1         |
|     |        | AFEnVTDLQWLILDHNLLENSK                      | 2613.3193 |
| 257 |        |                                             | 1         |
|     |        | LSHNELADSGIPGnSF <sub>n</sub> VSSLVELDLSYNK | 3221.5737 |
| 258 |        |                                             | 0         |
|     | P55058 | VSnVScQASVSR                                | 1294.6053 |
| 259 |        |                                             | 9         |
|     |        | EGHFYYnISEVK                                | 1486.6855 |
| 260 |        |                                             | 9         |
|     |        | IYSnHSALESLALIPLQAPLK                       | 2279.2644 |
| 261 |        |                                             | 4         |
|     | P55103 | EQEcEII <sub>S</sub> FAETGLSTInQTR          | 2427.1356 |
| 262 |        |                                             | 5         |
|     | P55290 | InNTHALV <sub>S</sub> LLQNLNK               | 1792.9917 |
| 263 |        |                                             | 9         |
|     | P80108 | LGTSLS <sub>S</sub> GHVLMnGTLK              | 1715.9008 |
| 264 |        |                                             | 0         |
|     |        | nLT <sub>S</sub> SLTESVDR                   | 1336.6578 |
| 265 |        |                                             | 8         |
|     |        | NInYTER                                     | 910.42656 |
| 266 |        |                                             |           |
|     |        | LGTSLS <sub>S</sub> GHVLMnGTLK              | 1731.8946 |
| 267 |        |                                             | 3         |

|     |        |                           |           |
|-----|--------|---------------------------|-----------|
|     | Q06033 | NAHGEEKEEnLTAR            | 1469.6982 |
| 268 |        |                           | 2         |
| 269 |        | EnLTAR                    | 704.35698 |
|     | Q08380 | TVIRPFYLTnSSGVD           | 1669.8439 |
| 270 |        |                           | 2         |
|     |        | ALGFEnATQALGR             | 1348.6851 |
| 271 |        |                           | 1         |
|     |        | GLnLTEDTYKPR              | 1407.7118 |
| 272 |        |                           | 4         |
|     |        | DAGVWcTnETR               | 1222.5372 |
| 273 |        |                           | 8         |
|     | Q12913 | TPEQGSnGTDGASQK           | 1477.6410 |
| 274 |        |                           | 4         |
|     |        | IHVAGETDSSNLnVSEPR        | 1925.9212 |
| 275 |        |                           | 4         |
| 276 | Q12981 | AnLTcK                    | 707.33843 |
|     | Q13201 | LnDSIQTLVNDNQR            | 1630.8032 |
| 277 |        |                           | 7         |
|     |        | FNPGAESVVLsnSTLK          | 1663.8561 |
| 278 |        |                           | 3         |
|     |        | VnESVVSIAAQK              | 1373.7275 |
| 279 |        |                           | 9         |
|     |        | LQnLTLPTnASIK             | 1414.7771 |
| 280 |        |                           | 5         |
|     |        | KIDnISLTVNDVR             | 1487.8046 |
| 281 |        |                           | 1         |
|     | Q14624 | LPTQnITFQTESSVAEQEAEFQSPK | 2810.3347 |
| 282 |        |                           | 6         |
|     | Q15063 | EVnDTLLVNELK              | 1387.7340 |
| 283 |        |                           | 6         |
|     | Q6EMK4 | LHEITnETFR                | 1260.6222 |
| 284 |        |                           | 4         |
|     | Q6UXB8 | SLPNFPnTSATAnATGGR        | 1777.8362 |
| 285 |        |                           | 3         |
|     | Q6YHK3 | TQDEILFSnSTR              | 1411.6692 |
| 286 |        |                           | 4         |
| 287 | Q7Z7G0 | EnGSFSGK                  | 826.35741 |
|     | Q8IZF2 | YEEQQLEIQnSSR             | 1624.7444 |
| 288 |        |                           | 3         |
| 289 | Q92954 | nGTLVAFR                  | 878.47283 |
|     | Q96IY4 | QVHFFVnASDVDNVK           | 1719.8346 |
| 290 |        |                           | 4         |
|     | Q96KN2 | LVPHmnVSAVEK              | 1340.6879 |
| 291 |        |                           | 1         |

|     |        |                           |           |
|-----|--------|---------------------------|-----------|
|     |        | LVPHMnVSAVEK              | 1324.6936 |
| 292 |        |                           | 1         |
|     | Q96PD5 | LEPVHLQLQcmSQEQLAQVAAnATK | 2824.3990 |
| 293 |        |                           | 8         |
|     |        | LEPVHLQLQcMSQEQLAQVAAnATK | 2808.4031 |
| 294 |        |                           | 7         |
|     |        | GFGVAIVGnYTAALPTEAALR     | 2092.1075 |
| 295 |        |                           | 8         |
|     | Q9BY67 | FQLLnFSSSELK              | 1413.7264 |
| 296 |        |                           | 9         |
|     | Q9HDC9 | AGPnGTLFVADAYK            | 1424.7046 |
| 297 |        |                           | 4         |
| 298 | Q9NQ38 | nGTLIcTR                  | 935.46178 |
| 299 | Q9UGM5 | YNNEnTSK                  | 970.40746 |
|     | Q9UK55 | LPYQGnATMLVVLMEK          | 1807.9321 |
| 300 |        |                           | 8         |
| 301 |        | ETFFnLSK                  | 986.48314 |
|     |        | ETFFnLSKR                 | 1142.5841 |
| 302 |        |                           | 5         |
|     | Q9Y5Y7 | KANQQLnFTEAK              | 1392.7114 |
| 303 |        |                           | 7         |
|     |        | ANQQLnFTEAK               | 1264.6169 |
| 304 |        |                           | 9         |
|     | Q9Y6R7 | YLPVnSSLLTSDcSER          | 1841.8571 |
| 305 |        |                           | 0         |
|     |        | VTVAAALGTnISIHKDEIGK      | 2066.1493 |
| 306 |        |                           | 1         |
|     |        | LLISLSESPASVSILSQADnTSK   | 2448.2782 |
| 307 |        |                           | 9         |

1

2 **Table S5.** Detailed information of phosphopeptides identified from human serum.

| Peak No. | Observed m/z | Phosphopeptide    |
|----------|--------------|-------------------|
| 1        | 1389.7030    | ADpSGEGDFLAEGGGV  |
| 2        | 1460.7516    | DpSGEGDFLAEGGGV   |
| 3        | 1545.8314    | DpSGEGDFLAEGGGVR  |
| 4        | 1616.8799    | ADpSGEGDFLAEGGGVR |

3

4 **Table S6.** Detailed information of phosphopeptides identified from human serum.

| Peak No. | Protein Group Accessions | Sequence                              | MH+ [Da]   |
|----------|--------------------------|---------------------------------------|------------|
| 1        |                          | AAFEcMyTLLDscLDR                      | 2124.78476 |
| 2        |                          | GEQGDGLRELNKQEsASDmTSTFPVAQsLtPGsMEER | 4318.72702 |
| 3        |                          | NLFHFGEsTtGsNFSFK                     | 2159.79253 |



|    |        |                                     |            |
|----|--------|-------------------------------------|------------|
| 4  |        | NVyMLAttVSSK                        | 1553.57512 |
| 5  |        | QQQDsIDPsSR                         | 1548.57584 |
| 6  |        | RtVLTTQPNGLTTVGK                    | 1765.92363 |
| 7  |        | tFsFAIPLIEK                         | 1425.64286 |
| 8  |        | tVVsSPGPGSGPGPGTTsGAssPARPAAtPLVPcR | 3639.39145 |
| 9  | A6NKC4 | tNISHNGTYHcSGK                      | 1655.65337 |
| 10 | O14791 | VTEPIsAESGEQVER                     | 1710.76006 |
| 11 | O95294 | AKssSLNVR                           | 1121.47209 |
| 12 | P00747 | QLGAGsIEEcAAK                       | 1413.60808 |
| 13 | P01008 | ATEDEGsEQKIPEATNR                   | 1954.83891 |
| 14 | P01042 | DIPTNsPELEETLHTITK                  | 2219.04856 |
| 15 |        | DIPTNsPELEETLHTITK                  | 2219.03647 |
| 16 |        | EsNEELTEScETK                       | 1635.61089 |
| 17 |        | ETTcSKEsNEELTEScETK                 | 2341.90093 |
| 18 |        | ETtcSKESNEELTEScETK                 | 2341.90702 |
| 19 |        | ETTcSKEsNEELTEScETKK                | 2469.99826 |
| 20 | P02649 | GEVQAMLGQsTEELR                     | 1727.77031 |
| 21 | P02751 | TNTNVNcPIEcFMPLDVQADREDSRE          | 3190.33152 |
| 22 | P02765 | cDSSPDsAEDVR                        | 1417.49126 |
| 23 |        | cDSSPDsAEDVRK                       | 1545.59490 |
| 24 | P02768 | ADDKEtcFAEEGKK                      | 1707.68852 |
| 25 |        | EtYGEMADccAK                        | 1514.49040 |
| 26 |        | TcVADEsAENcDK                       | 1578.54607 |
| 27 | P04114 | VREsDEETQIK                         | 1413.62639 |
| 28 | P05546 | ENtVTNDWIPEGEEDDDYLDLEK             | 2819.13132 |
| 29 |        | GGEtAQSADPQWEQLNNK                  | 2052.86724 |
| 30 | P10909 | VtTVASHTSDSDVPSGVTEVVVK             | 2394.14444 |
| 31 | P49908 | DMPAsEDLQDLQK                       | 1569.65190 |
| 32 | Q05084 | TEDGKSILsALDK                       | 1456.69768 |
| 33 | Q9H5V7 | tTPTGGLPR                           | 979.46288  |

1

2

## References

3

- 1 Sun, S. & Zeng, H. Size-Controlled Synthesis of Magnetite Nanoparticles. *J. Am. Chem. Soc.* **124**, 8204-8205 (2002).

4

5
